# Supplementary material for: High-Contrast Stimulation Potentiates the Neurotrophic Properties of Müller Cells and Suppresses Their Pro-Inflammatory Phenotype
Source: MDPI journal article supplement (doi:10.3390/ijms23158615), 2022-08-03
Supplement: s1 [file s1]

Figure S3

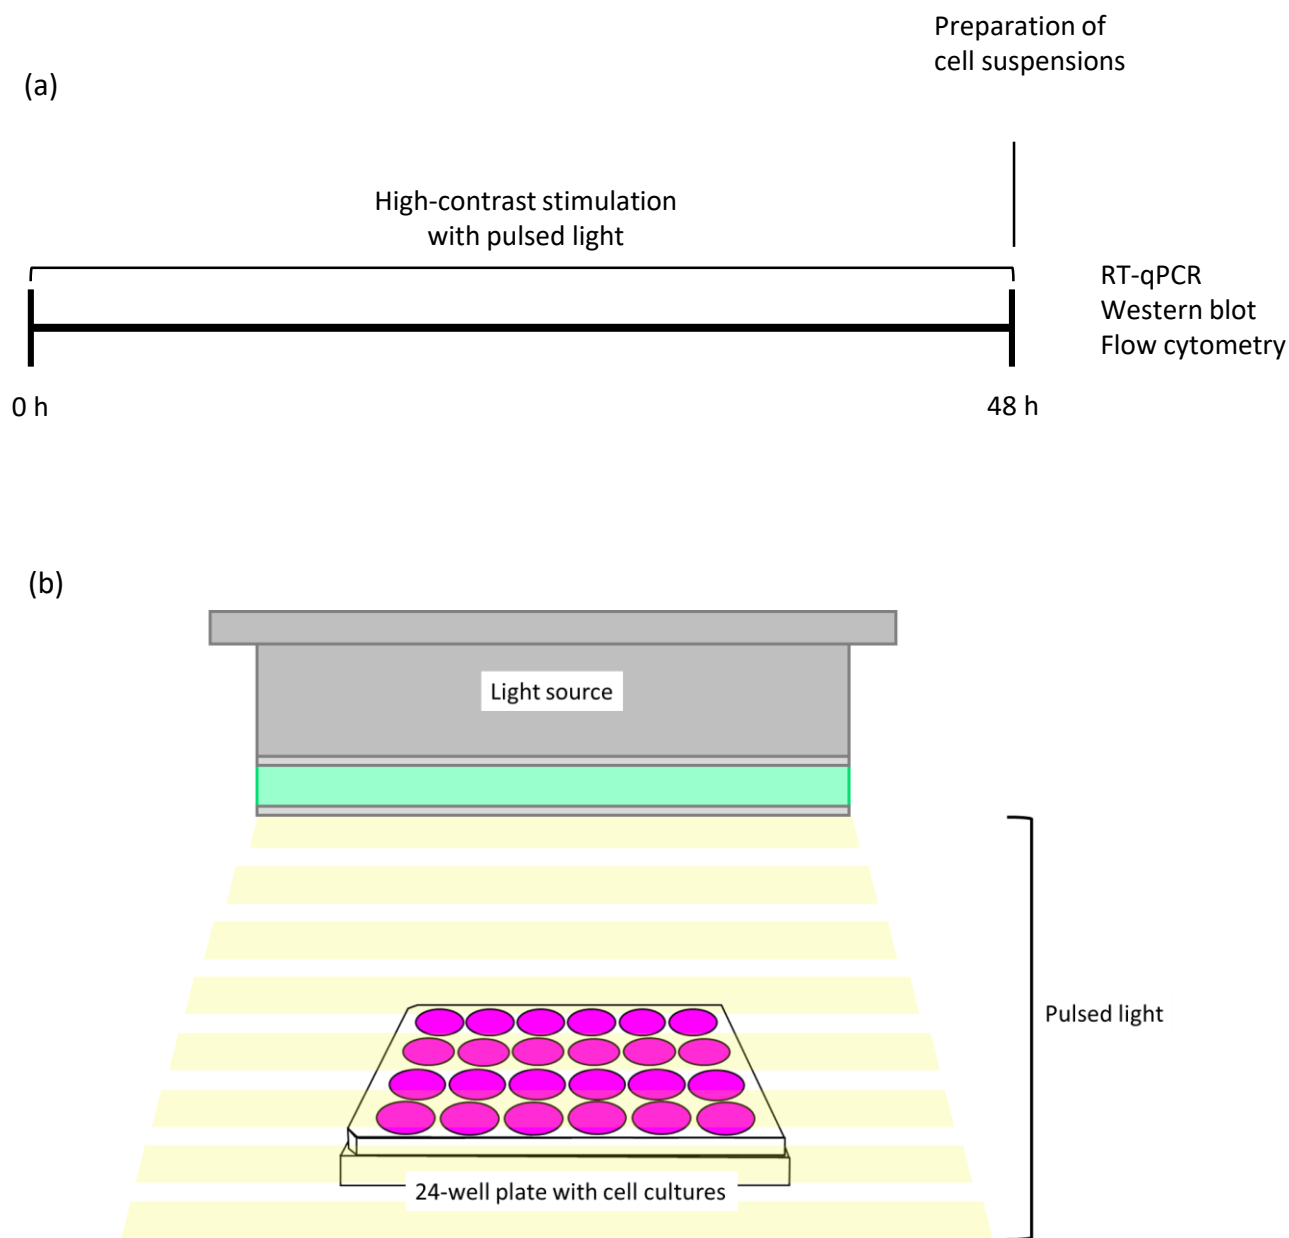

**Figure S3.** (a) Schematic representation of the in vitro experimental design. (b) Scheme of the in vitro high-contrast visual stimulation, during which the light source emits pulsed light that reaches all cells seeded in the 24-well plate.
